# Supplementary material for: Dynamic photo-switching in light-responsive JUC-62 for CO2capture
Source: PubMed Central journal article supplement (PMC5645403; doi:10.1038/s41598-017-13536-4), 2017-10-17
Supplement: 41598_2017_13536_MOESM1_ESM.pdf [file 41598_2017_13536_MOESM1_ESM.pdf]

# Dynamic photo-switching in light-responsive JUC-62 for CO<sub>2</sub> capture

Nicholaus Prasetya<sup>1</sup> and Bradley Ladewig<sup>1,\*</sup>

<sup>1</sup>Barrer Centre, Chemical Engineering Department, Imperial College London, Exhibition Road, London SW7 2AZ, United Kingdom

[\\*b.ladewig@imperial.ac.uk](mailto:b.ladewig@imperial.ac.uk)

---

## Contents

|    |                                                             |    |
|----|-------------------------------------------------------------|----|
| 1. | H-NMR spectrum of 3,3'-5,5'-azobenzene tetracarboxylic acid | S2 |
| 2. | C-NMR spectrum of 3,3'-5,5'-azobenzene tetracarboxylic acid | S3 |
| 3. | CO <sub>2</sub> adsorption control experiment               | S3 |

# 1. <sup>1</sup>H-NMR Spectrum of 3,3'-5,5'-azobenzene tetracarboxylic acid

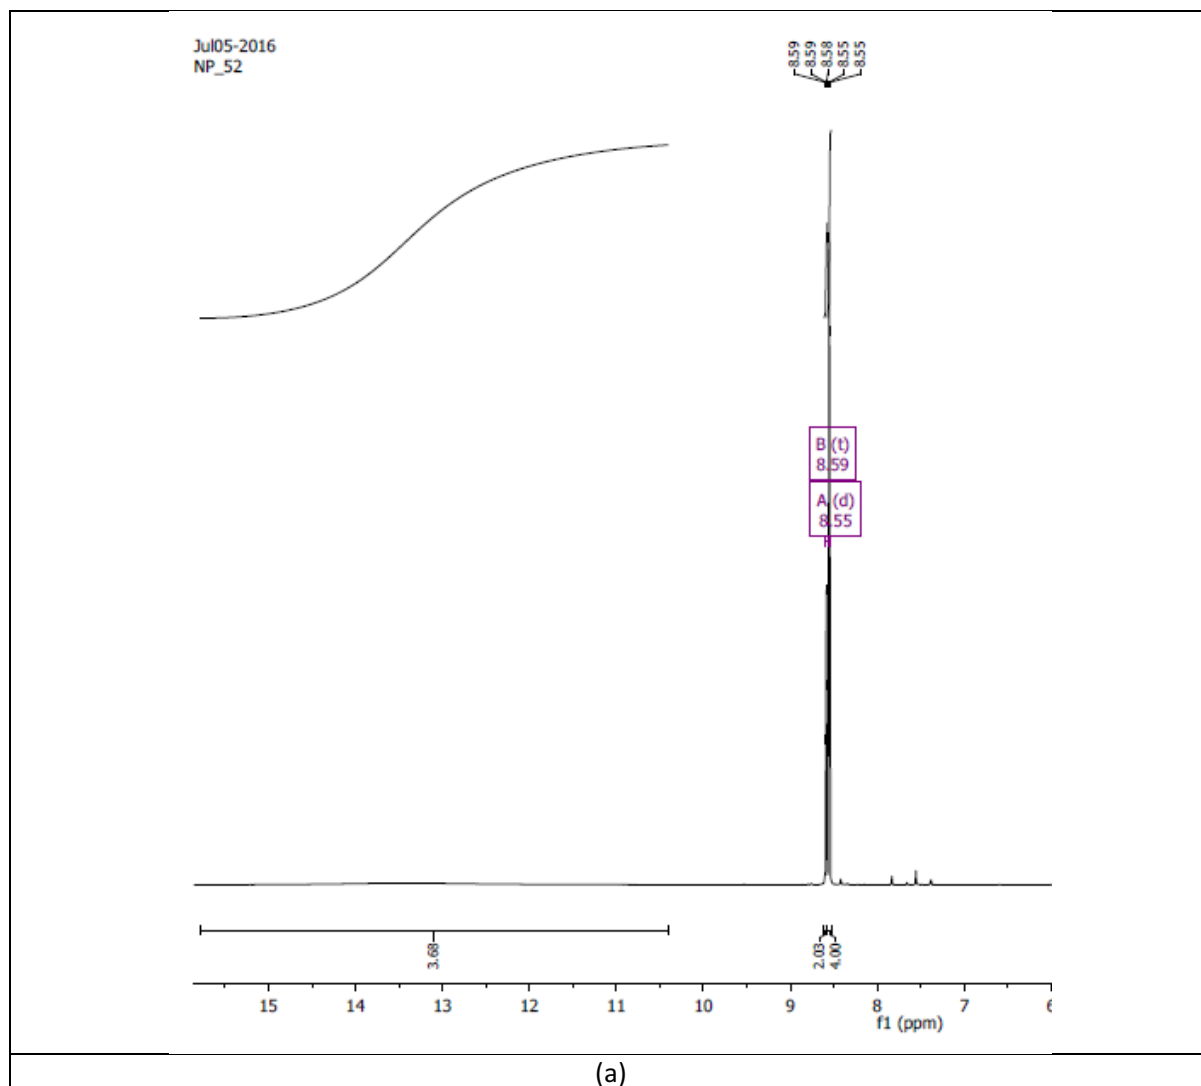

Supplementary Figure S 1. <sup>1</sup>H-NMR spectrum of 3,3'-5,5'-azobenzene tetracarboxylic acid (*d*<sub>6</sub>-DMSO) (<sup>1</sup>H NMR (400 MHz, DMSO) δ 8.61-8.57 (t, *J* = 1.6 Hz, 2H), 8.56-8.54 (d, *J* = 1.6 Hz, 4H))

## 2. C-NMR spectrum of 3,3-5,5'-azobenzene tetracarboxylic acid

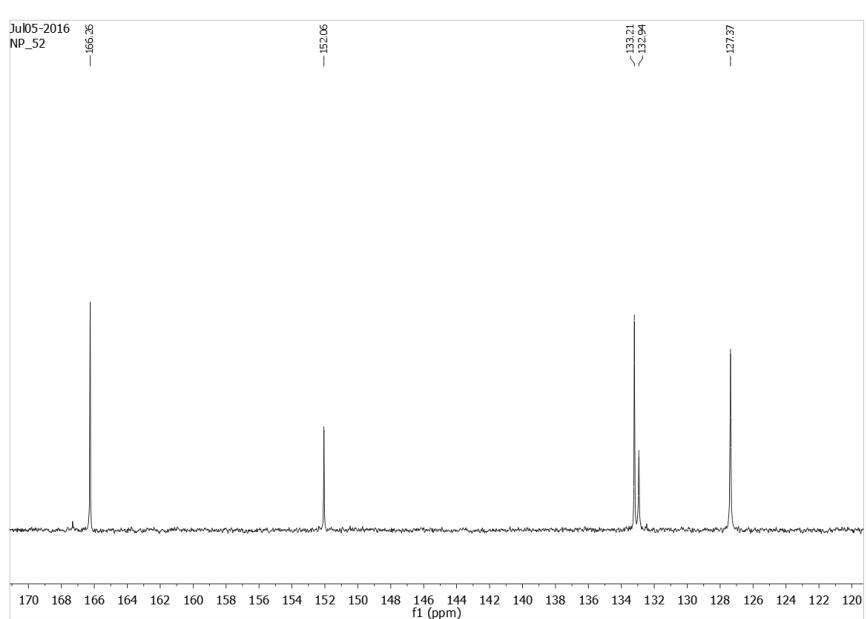

Supplementary Figure S 2. C-NMR Spectrum of 3,3'-5,5'-azobenzene tetracarboxylic acid ( $^{13}\text{C}$  NMR (101 MHz, DMSO)  $\delta$  166.26, 152.06, 133.21, 132.94, 127.37)

## 3. CO<sub>2</sub> adsorption control experiment

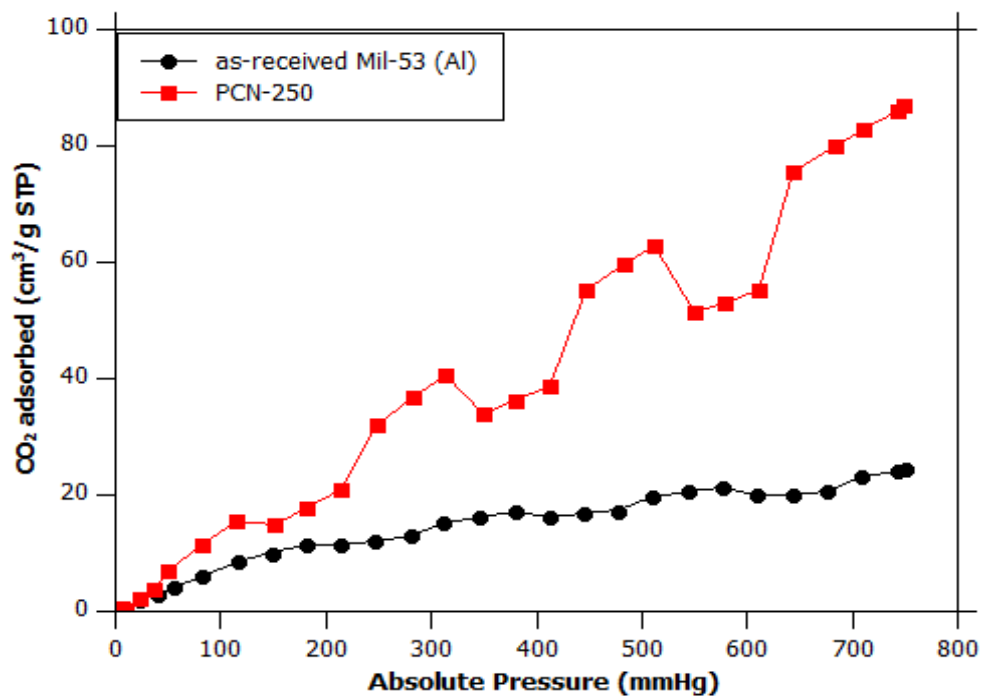

Supplementary Figure S 3. CO<sub>2</sub> adsorption dynamic photoswitching experiment using as-received Mil-53(Al) BASF and PCN-250
